# Supplementary material
Source: Springer Nature journal article supplement (https://www.springermedizin.de/resource/supplementary/13024_2012_326_MOESM4_ESM.pdf/9643746)

A

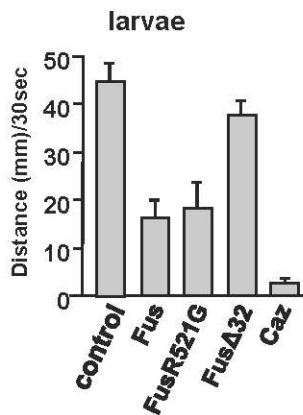

B

Larval brain extracts

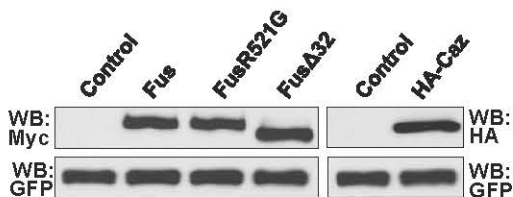

C

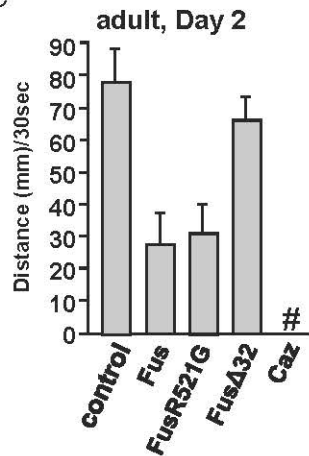

D

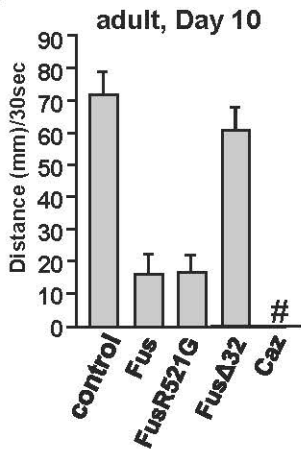

Supplement: MOESM4 [file 9643746]
